# Supplementary material for: A new synthetic approach to force bond formation between a transition metal complex and a thiostannate anion: solvothermal synthesis and crystal structure of [Co2(cyclam)2Sn2S6]·2H2O
Source: Royal Society of Chemistry journal article supplement (doi:10.1039/c3ce40976g), 2013-01-01
Supplement: c3ce40976g.pdf [file c3ce40976g.pdf]

## - Supporting Material -

### **A new synthetic approach to force bond formation between a transition metal complex and a thiostannate anion: solvothermal synthesis and crystal structure of $[\text{Co}_2(\text{cyclam})_2\text{Sn}_2\text{S}_6]\cdot 2\text{H}_2\text{O}$**

Christoph Zeisler, Christian Näther, Wolfgang Bensch\*

#### **Experimental Details**

##### *Single crystal X-ray analysis*

Data collection was performed using an Imaging Plate Diffraction System (IPDS-1) from STOE & CIE using  $\text{K}\alpha_1$ -radiation. The structure was solved with direct methods using SHELXS-97 and structure refinements were performed against  $F^2$  using SHELXL-97. Numerical absorption correction was applied using X-RED and X-SHAPE of the program package X-Area. All non hydrogen atoms were refined with anisotropic displacement parameters. All C-H hydrogen atoms were positioned with idealized geometry and were refined isotropic with  $U_{\text{iso}}(\text{H}) = -1.2 U_{\text{eq}}(\text{C})$  using a riding model. The O-H hydrogen atoms were located in difference map, their bond lengths set to ideal values and afterwards they were refined isotropic with  $U_{\text{iso}}(\text{H}) = -1.5 U_{\text{eq}}(\text{O})$  using a riding model.

CCDC ?????? contain the supplementary crystallographic data for this paper. These data can be obtained free charge from the Cambridge Crystallographic Data Centre via [http://www.ccdc.cam.ac.uk/data\\_request/cif](http://www.ccdc.cam.ac.uk/data_request/cif).

##### *Raman spectroscopy*

The Raman spectrum was measured in the region from 100 to 3500  $\text{cm}^{-1}$  with a Bruker IFS 66 Fourier Transform Raman spectrometer (wavelength: 541.5 nm).

##### *UV/Vis spectroscopy*

UV/Vis spectroscopic investigation was conducted at room temperature using a UV-VIS-NIR two-channel spectrometer Cary 5 from Varian Techtron Pty., Darmstadt. The absorption data were calculated with the Kubelka-Munk relation for diffuse reflectance data.  $\text{BaSO}_4$  powder was used as reference material.

Table S1. Bond lengths and angles in Å and °. Symmetry codes to generate equivalent atoms: A: -x+1,-y+2,-z+2; B: -x+1,-y+2,-z+1; C: #3 -x,-y+1,-z+1

|               |           |              |           |
|---------------|-----------|--------------|-----------|
| Sn1-S2        | 2.336(1)  | Sn1-S3       | 2.447(1)  |
| Sn1-S1        | 2.339(1)  | Sn1-S3A      | 2.456(1)  |
| S2-Sn1-S1     | 113.92(3) | S2-Sn1-S3A   | 112.63(3) |
| S2-Sn1-S3     | 112.29(3) | S1-Sn1-S3A   | 110.82(3) |
| S1-Sn1-S3     | 112.25(2) | S3-Sn1-S3A   | 93.21(2)  |
| Sn1-S1-Co1    | 124.34(3) | Sn1-S2-Co2   | 116.91(3) |
| Sn1-S3-Sn1A   | 86.79(2)  | Co1-S1B      | 2.715(1)  |
| Co1-S1        | 2.715(1)  | Co1-N1       | 1.982(2)  |
| Co1-N2        | 1.986(2)  | Co1-N2B      | 1.986(2)  |
| Co1-N1B       | 1.982(2)  | N2B-Co1-S1B  | 93.65(7)  |
| N1B-Co1-N2B   | 86.31(11) | N2-Co1-S1B   | 86.35(7)  |
| N1-Co1-N2B    | 93.69(11) | N1B-Co1-S1   | 88.68(7)  |
| N1B-Co1-N2    | 93.69(11) | N1-Co1-S1    | 91.32(7)  |
| N1-Co1-N2     | 86.31(11) | N2B-Co1-S1   | 86.35(7)  |
| N1B-Co1-S1B   | 91.32(7)  | N2-Co1-S1    | 93.65(7)  |
| N1-Co1-S1B    | 88.68(7)  | S1B-Co1-S1   | 180.0     |
| N1B-Co1-N1    | 180.0     | N2B-Co1-N2   | 180.0     |
| Co-S2         | 2.806(1)  | Co2-S2C      | 2.806(1)  |
| Co2-N12       | 1.985(2)  | Co2-N11      | 1.977(2)  |
| Co2-N12C      | 1.985(2)  | Co2-N11C     | 1.977(2)  |
| N11-Co2-N12   | 86.00(10) | N11-Co2-S2   | 92.30(7)  |
| N11C-Co2-N12  | 94.00(10) | N11C-Co2-S2  | 87.70(7)  |
| N11-Co2-N12C  | 94.00(10) | N12-Co2-S2   | 94.57(7)  |
| N11C-Co2-N12C | 86.00(10) | N12C-Co2-S2  | 85.43(7)  |
| N11-Co2-S2C   | 87.70(7)  | N11-Co2-N11C | 180.0     |
| N11C-Co2-S2C  | 92.30(7)  | N12-Co2-N12C | 180.0     |
| N12-Co2-S2C   | 85.43(7)  | S2C-Co2-S2   | 180.0     |
| N12C-Co2-S2C  | 94.57(7)  |              |           |

Table S2: Hydrogen bonding in Å and °. Symmetry codes to generate equivalent atoms: A = -x+1, -y+2, -z+2; B = -x, -y+1, -z+1; C: -x, -y+2, -z+1.

|                | D-H   | d(H..A) | d(D..A) |
|----------------|-------|---------|---------|
| N1-H1N...S3    | 2.553 | 154.5   | 3.397   |
| N11-H11N...S1  | 2.491 | 155.5   | 3.341   |
| N12-H12N...O1B | 2.615 | 161.8   | 3.491   |
| O1-H1O...S2    | 2.526 | 166.1   | 3.328   |

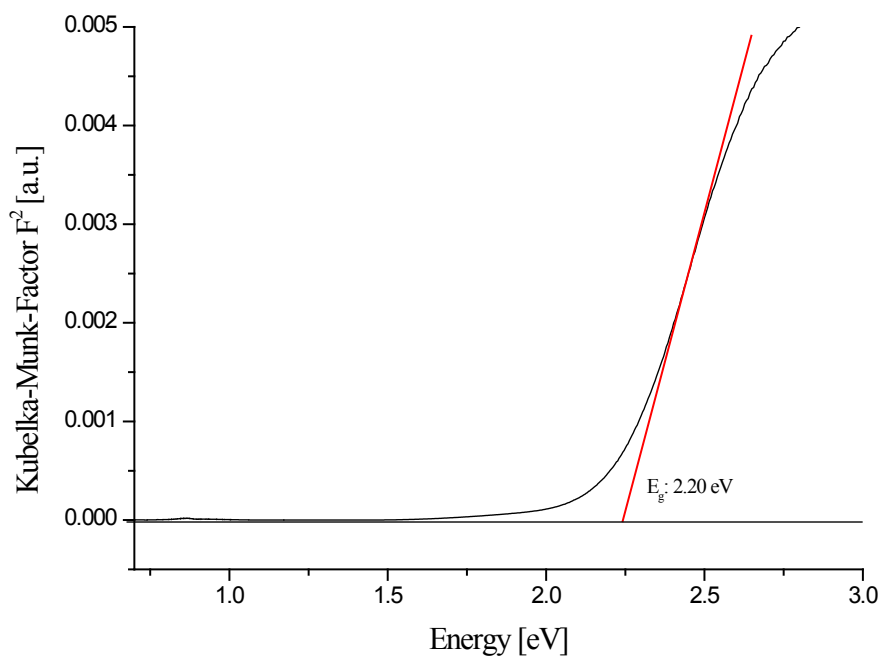

Fig. S1: The UV-Vis spectrum of the title compound to determine the optical bandgap.

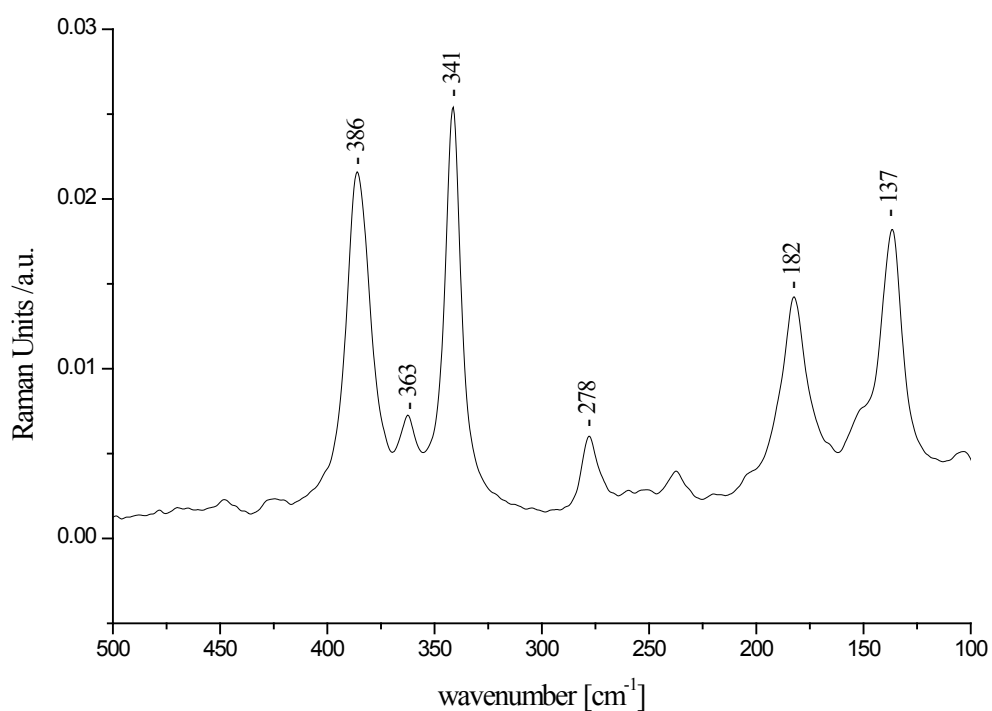

Fig. S2: The Raman spectrum of the title compound with the wavenumbers of the most prominent bands.
